# Supplementary material for: The effect of Chlorella pyrenoidosa supplementation on immune responses to 2 days of intensified training
Source: Eur J Nutr. 2017 Aug 19;57(7):2529–36. doi: 10.1007/s00394-017-1525-9 (PMC6182698; doi:10.1007/s00394-017-1525-9)
Supplement: Supplementary file 1 — Supplementary material 1 (XLSX 12 kb) [file 394_2017_1525_MOESM1_ESM.xlsx]

## Sheet: Sheet1
The effect of Chlorella Pyrenoidosa supplementation on immune responses to two days of intensified training.
Corinna Chidley1, Glen Davison1
1Endurance Research Group, School of Sport and Exercise Sciences, University of Kent, UK
ADDRESS FOR CORRESPONDENCE
Corinna Chidley
Endurance Research Group, School of Sport and Exercise Sciences,
The Medway Campus, University of Kent,
KENT, ME4 4AG
United Kingdom
Telephone:	+44 (0)1634 888994
Fax:		+44 (0)1634 888890
Email:	ck313@kent.ac.uk
	Table S1: Nutritional information for SunChlorella A tablets
	Nutrient	/6g
	Moisture (g)	0.2
	Protein (g)	3.2
	Fat (g)	0.8
	Ash (g)	0.4
	Total carbohydrate (g)	1.2
	Sugar (g)	0.6
	Dietary fiber (g)	0.75
	Energy (g)	24
	Vitamin A (retinol equivalents) (µg)	210
	Retinol (µg)	not detected
	a-carotene (µg)	378
	ß-carotene (µg)	1074
	Vitamin B1 (mg)	0.1
	Vitamin B2 (mg)	0.28
	Vitamin B6 (mg)	0.1
	Vitamin B12 (mg)	0.14
	Vitamin C (mg)	0.72
	Vitamin D (µg)	54
	Vitamin D (IU)	2160
	Vitamin E (mg)	0.22
	Vitamin K1 (µg)	52
	Vitamin K2 (µg)	not detected
	Biotin (µg)	12
	Calcium (mg)	44.8
	Chlorophyll (mg)	126
	Chlorophyll B (mg)	not detected
	Copper (mg)	0.02
	Folic acid (mg)	0.072
	Iodine (mg)	not detected
	Iron (mg)	9.8
	Magnesium (mg)	21.4
	Manganese (mg)	2.16
	Niacin equivalent (mg)	2.22
	Niacin (as nicotinic acid) (mg)	1.18
	Trypophan (mg)	0.0624
	Pantothenic acid (mg)	0.1
	Phosphorus (mg)	0.0966
	Potassium (mg)	59.4
	Sodium (mg)	2.2
	Zinc (mg)	0.06
